# Supplementary material
Source: PubMed Central journal article supplement (PMC11449394)
Supplement: mbc-35-ar117-s001.pdf [file mbc-35-ar117-s001.pdf]

# Supplemental Materials

*Molecular Biology of the Cell*

Rajakumar *et al.*

## Supplemental Materials

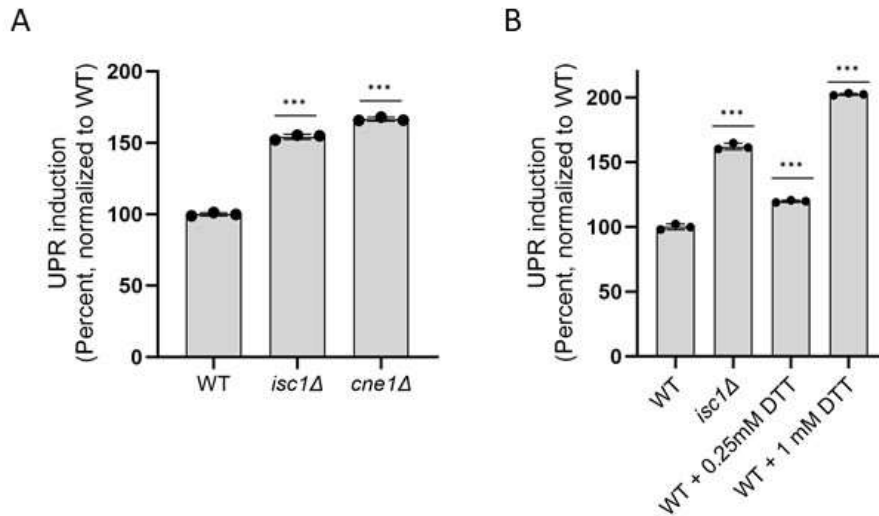

### Supplementary Figure 1: Constitutive induction of UPR in *isc1Δ* mutant is comparable to known genetic and chemical UPR inducers.

(A) Induction of UPR in WT and mutants, as determined by flow cytometry. (B) UPR induction of WT cells treated with DTT (0.25 mM and 1 mM) and *isc1Δ*, as determined by flow cytometry. Error bars represent standard deviations from technical triplicates. \*\*\*,  $p \leq 0.001$ , two-tailed Student's t-test for comparisons relative to WT. Similar results were obtained in 4 (panel A) and 2 (panel B) independent experiments, respectively.

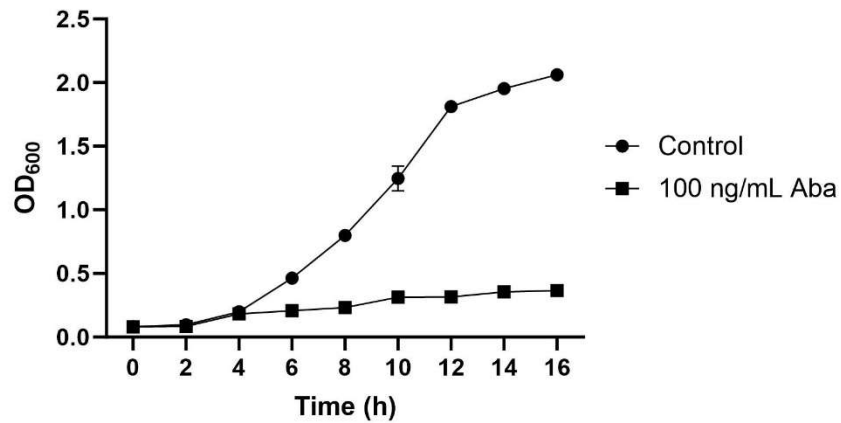

**Supplementary Figure 2. Growth inhibition by Aureobasidin A.**

Wild-type cells were cultured in synthetic complete media in the absence or presence of 100 ng/mL Aureobasidin A (Aba). Optical density (OD<sub>600</sub>) was measured at the indicated time points. Error bars show standard deviations from triplicate cultures.
